# Supplementary material for: Large-scale synthesis of gold dendritic nanostructures for surface enhanced Raman scattering
Source: Royal Society of Chemistry journal article supplement (doi:10.1039/c5ce00407a), 2015-01-01
Supplement: c5ce00407a1.pdf [file c5ce00407a1.pdf]

***Supporting information***

Large scale synthesis of gold dendritic nanostructures for surface  
enhanced Raman scattering

*Tianyu Xia,<sup>ab</sup> Hu Luo,<sup>a</sup> Shouguo Wang,<sup>\*b</sup> Jialong Liu<sup>a</sup>, Guanghua Yu<sup>b</sup> and*

*Rongming Wang<sup>\*ab</sup>*

<sup>a</sup>Department of Physics, Beihang University, Beijing 100191, China

<sup>b</sup>University of Science and Technology Beijing, Beijing 100083, China.

\* Corresponding authors:

E-mail: [sgwang@ustb.edu.cn](mailto:sgwang@ustb.edu.cn) and [rmwang@ustb.edu.cn](mailto:rmwang@ustb.edu.cn)

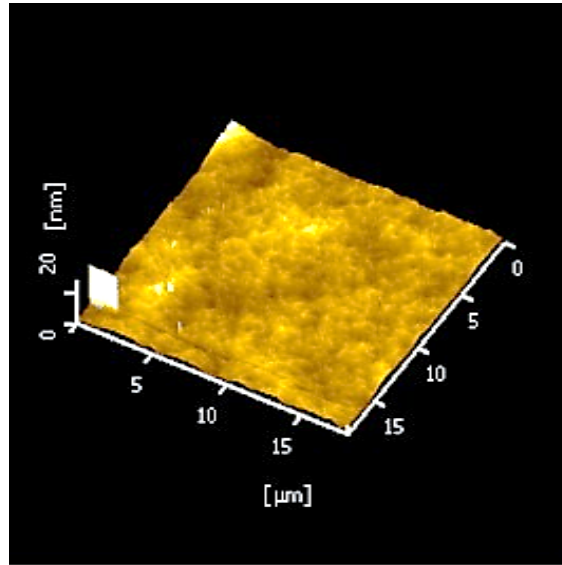

**Fig. S1** AFM image of patterned Si wafer.

**Table S1:** Roughness (in nm) of patterned area.

| <b>Ra</b>   | <b>Rz</b>   | <b>P-V</b>  |
|-------------|-------------|-------------|
| <b>0.11</b> | <b>0.76</b> | <b>1.21</b> |

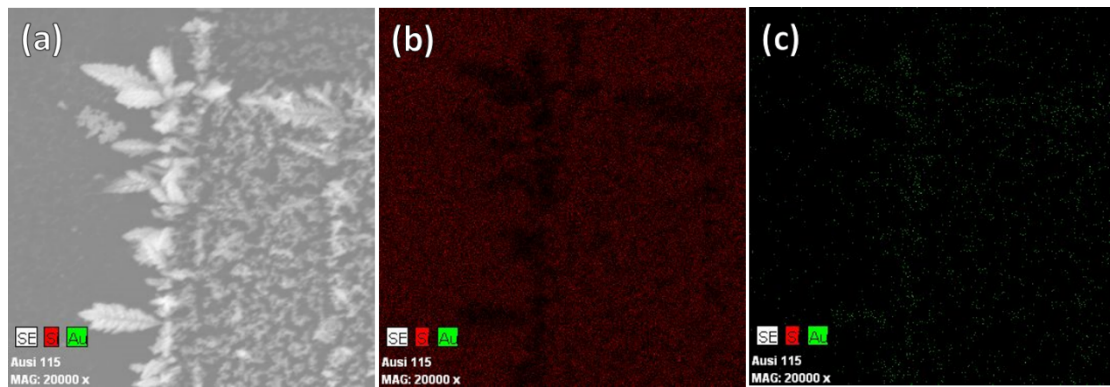

**Fig. S2** SEM mapping image of Au dendritic nanostructures, (b) and (c) shows the distribution of Si and Au, respectively.

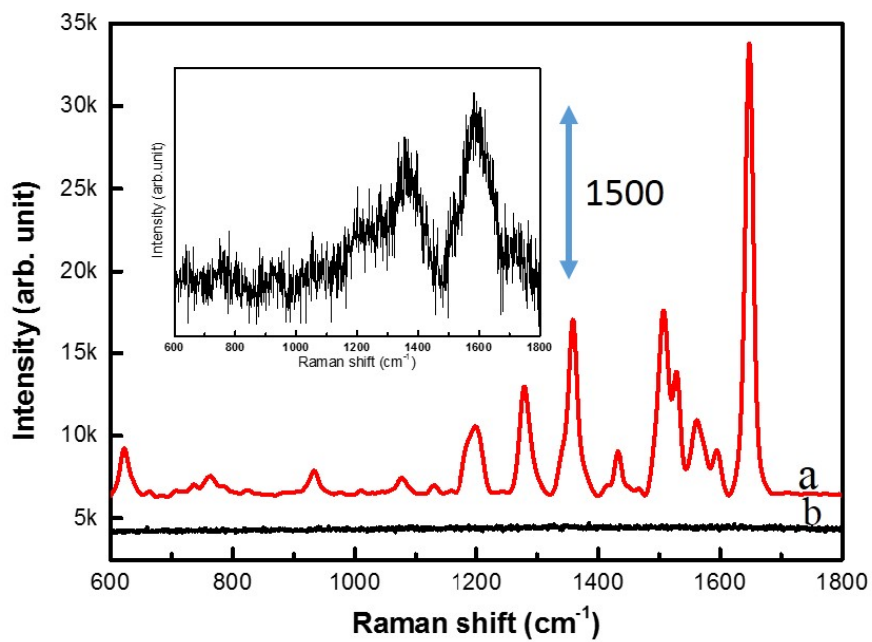

**Fig. S3** SERS spectra collected from  $10^{-6}$  M RhB adsorbed on Au dendritic nanostructures (line a) and Raman spectra of solid RhB (line b). Inset: magnified spectra of solid RhB.
